# Supplementary material for: Machine Learning-Driven Investigation of Associations Between Phthalate Biomarkers and Glaucoma Using US NHANES Data (2011–2016)
Source: Research Square preprint supplement (doi:10.21203/rs.3.rs-7009815/v1), 2025-08-04
Supplement: Supplementary file 1 [file 504c33a8a54d8d59bf423131.docx]

**Machine learning-based identification of associations between phthalate exposure and glaucoma: Analysis of data from the US NHANES (2005–2008)**

**Table of Contents**

**Supplemental Figure 1.** Receiver Operating Characteristic (ROC) Curves for the 11 Machine Learning Models in the Training Cohort.

**Supplemental Figure 2.**Classification Performance Assessment Using Confusion Matrices for the Predictive Models.

**Supplemental Figure 3.** Ranking of Feature Importance within the Predictive Model.

**Supplemental Figure 4.** Individualized Glaucoma Risk Probability Estimation.


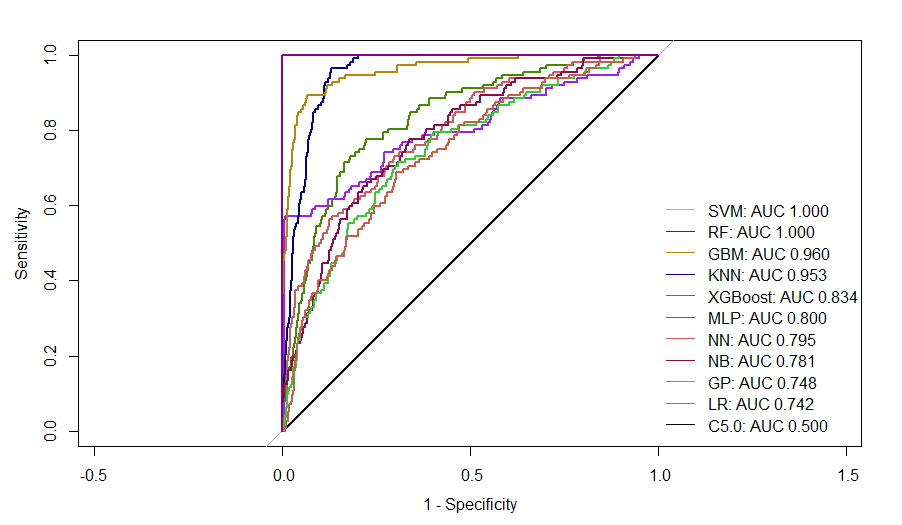


**Supplemental Figure 1.** Receiver Operating Characteristic (ROC) Curves for the 11 Machine Learning Models in the Training Cohort.


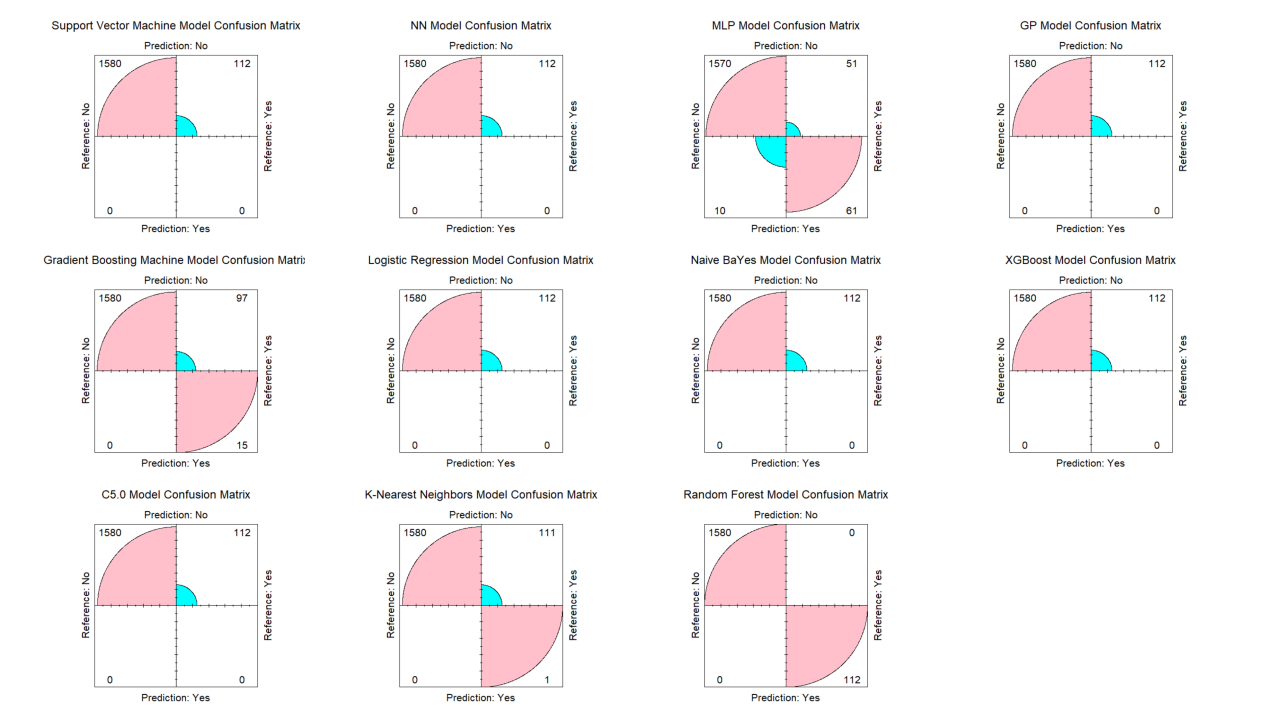


**Supplemental Figure 2.** Classification Performance Assessment Using Confusion Matrices for the Predictive Models.


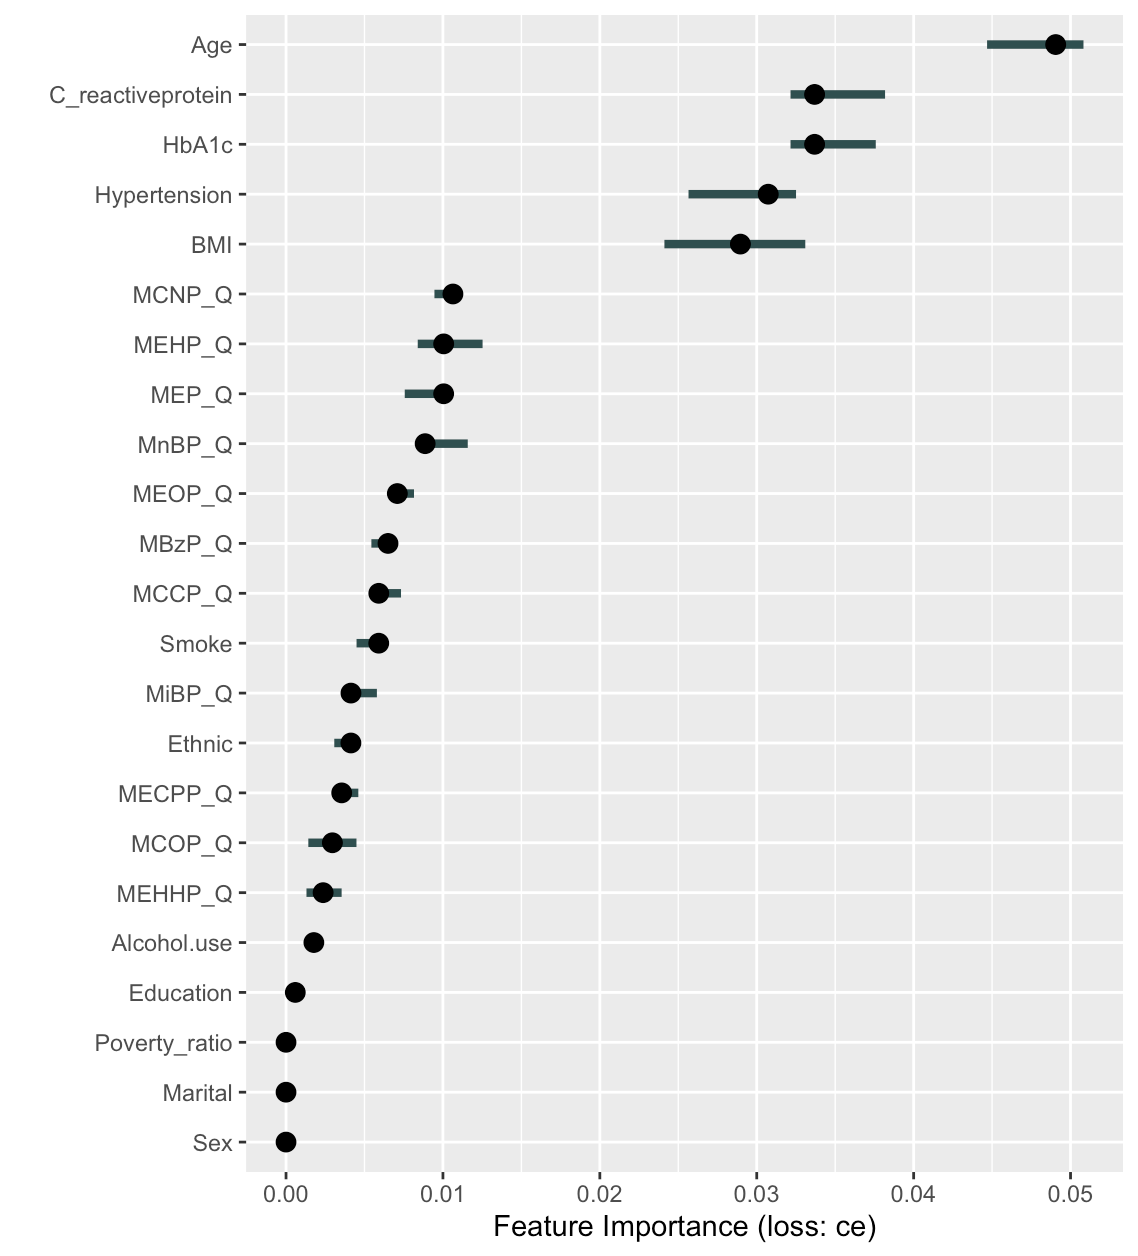


**Supplemental Figure 3.** Ranking of Feature Importance within the Predictive Model.


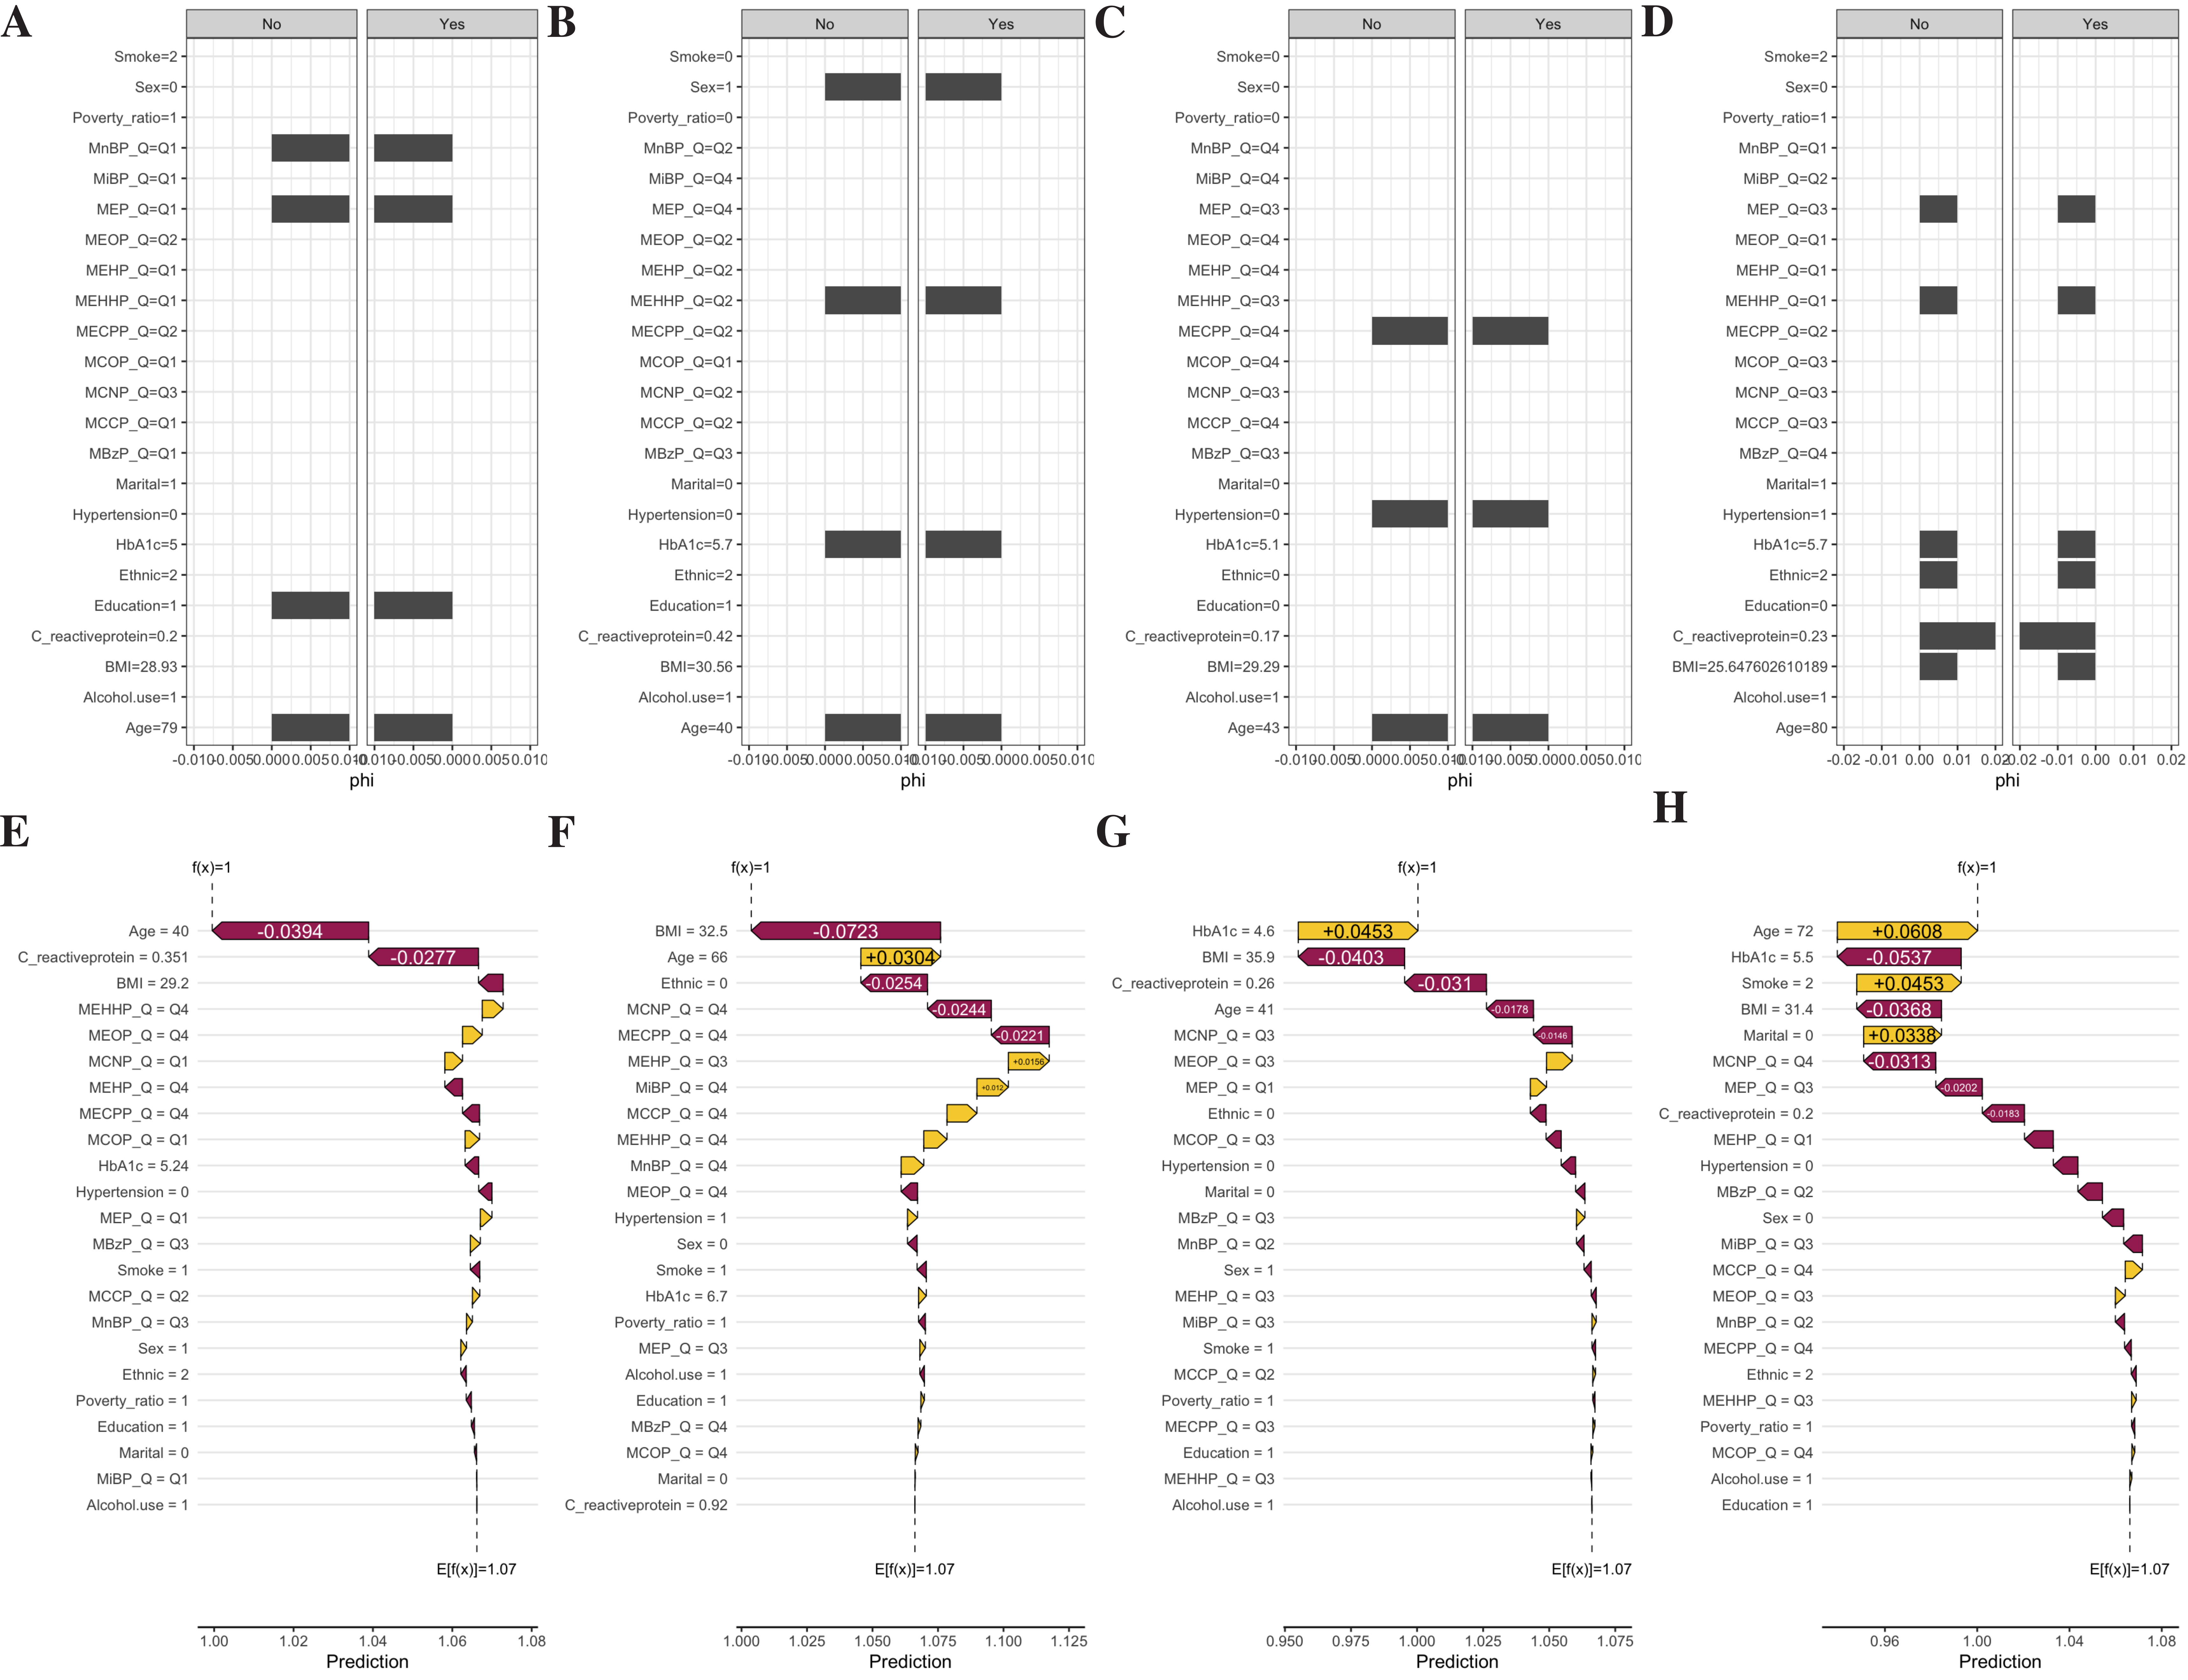


**Supplemental Figure 4.** Individualized Glaucoma Risk Probability Estimation.

SHAP was utilized in individualized decision-making analysis to visualize patient-specific profiles for outcome prediction. In panels E–H, yellow bars represent variables that promote glaucoma progression, while purple bars denote factors associated with a protective effect.
